# Supplementary material
Source: Springer Nature journal article supplement (https://www.springermedizin.de/resource/supplementary/12887_2009_300_MOESM1_ESM.pdf/9477724)
Supplement: MOESM1 [file 9477724]

**Phase I:**  
Knowledge and attitudes

All FPs and HPs of the region.  
Self-administered questionnaire  
(n. of paediatricians = 540 FPs and 212  
HPs)

A sample of parents: all vaccination  
centres open at least 5 days a week.  
Self-administered questionnaire  
(n. of centres = 51 out of the existing 233;  
n. of parents= 1029 )

**Phase II:**  
Patient care practices and parents  
expectations and satisfaction

A stratified sample of regional  
FPs and HPs.  
Self-administered questionnaire  
(n. of paediatricians = 120 FPs and 26  
HPs working at emergency services)

A sub-sample of parents in 4 Local  
Health Authorities.  
Interviews  
(n. of interviews= 359 )
